# Supplementary material for: Prevalence of human papillomavirus infection and associated factors among women attending cervical cancer screening in setting of Addis Ababa, Ethiopia
Source: PubMed Central journal article supplement (PMC10876560; doi:10.1038/s41598-024-54754-x), 2024-02-19
Supplement: 41598_2024_54754_MOESM1_ESM.pdf [file 41598_2024_54754_MOESM1_ESM.pdf]

# Gel Doc Result

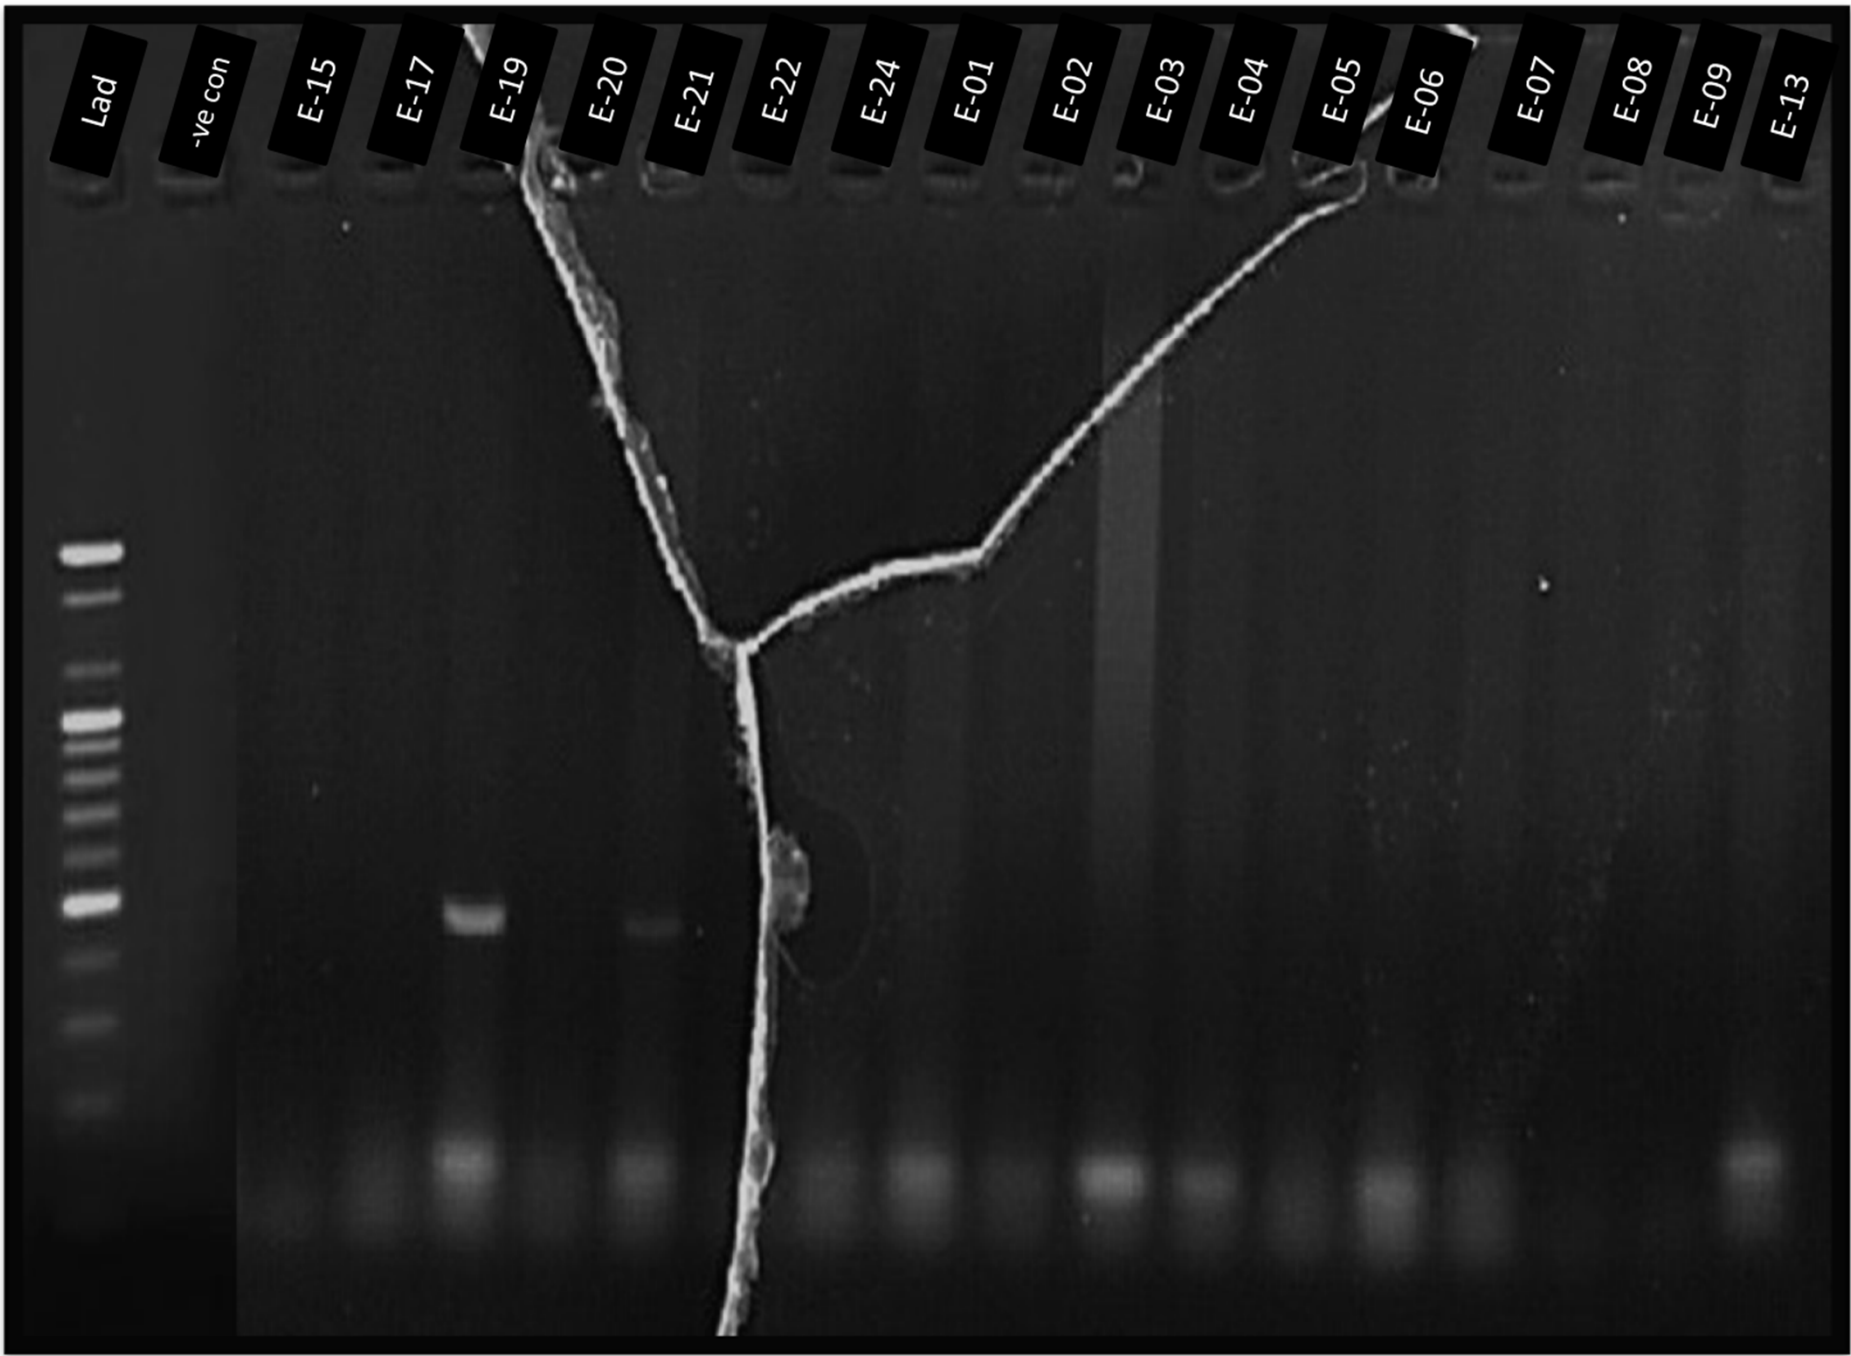

Lad

-ve con

E-15

E-17

E-19

E-20

E-21

E-22

E-24

E-01

E-02

E-03

E-04

E-05

E-06

E-07

E-08

E-09

E-13

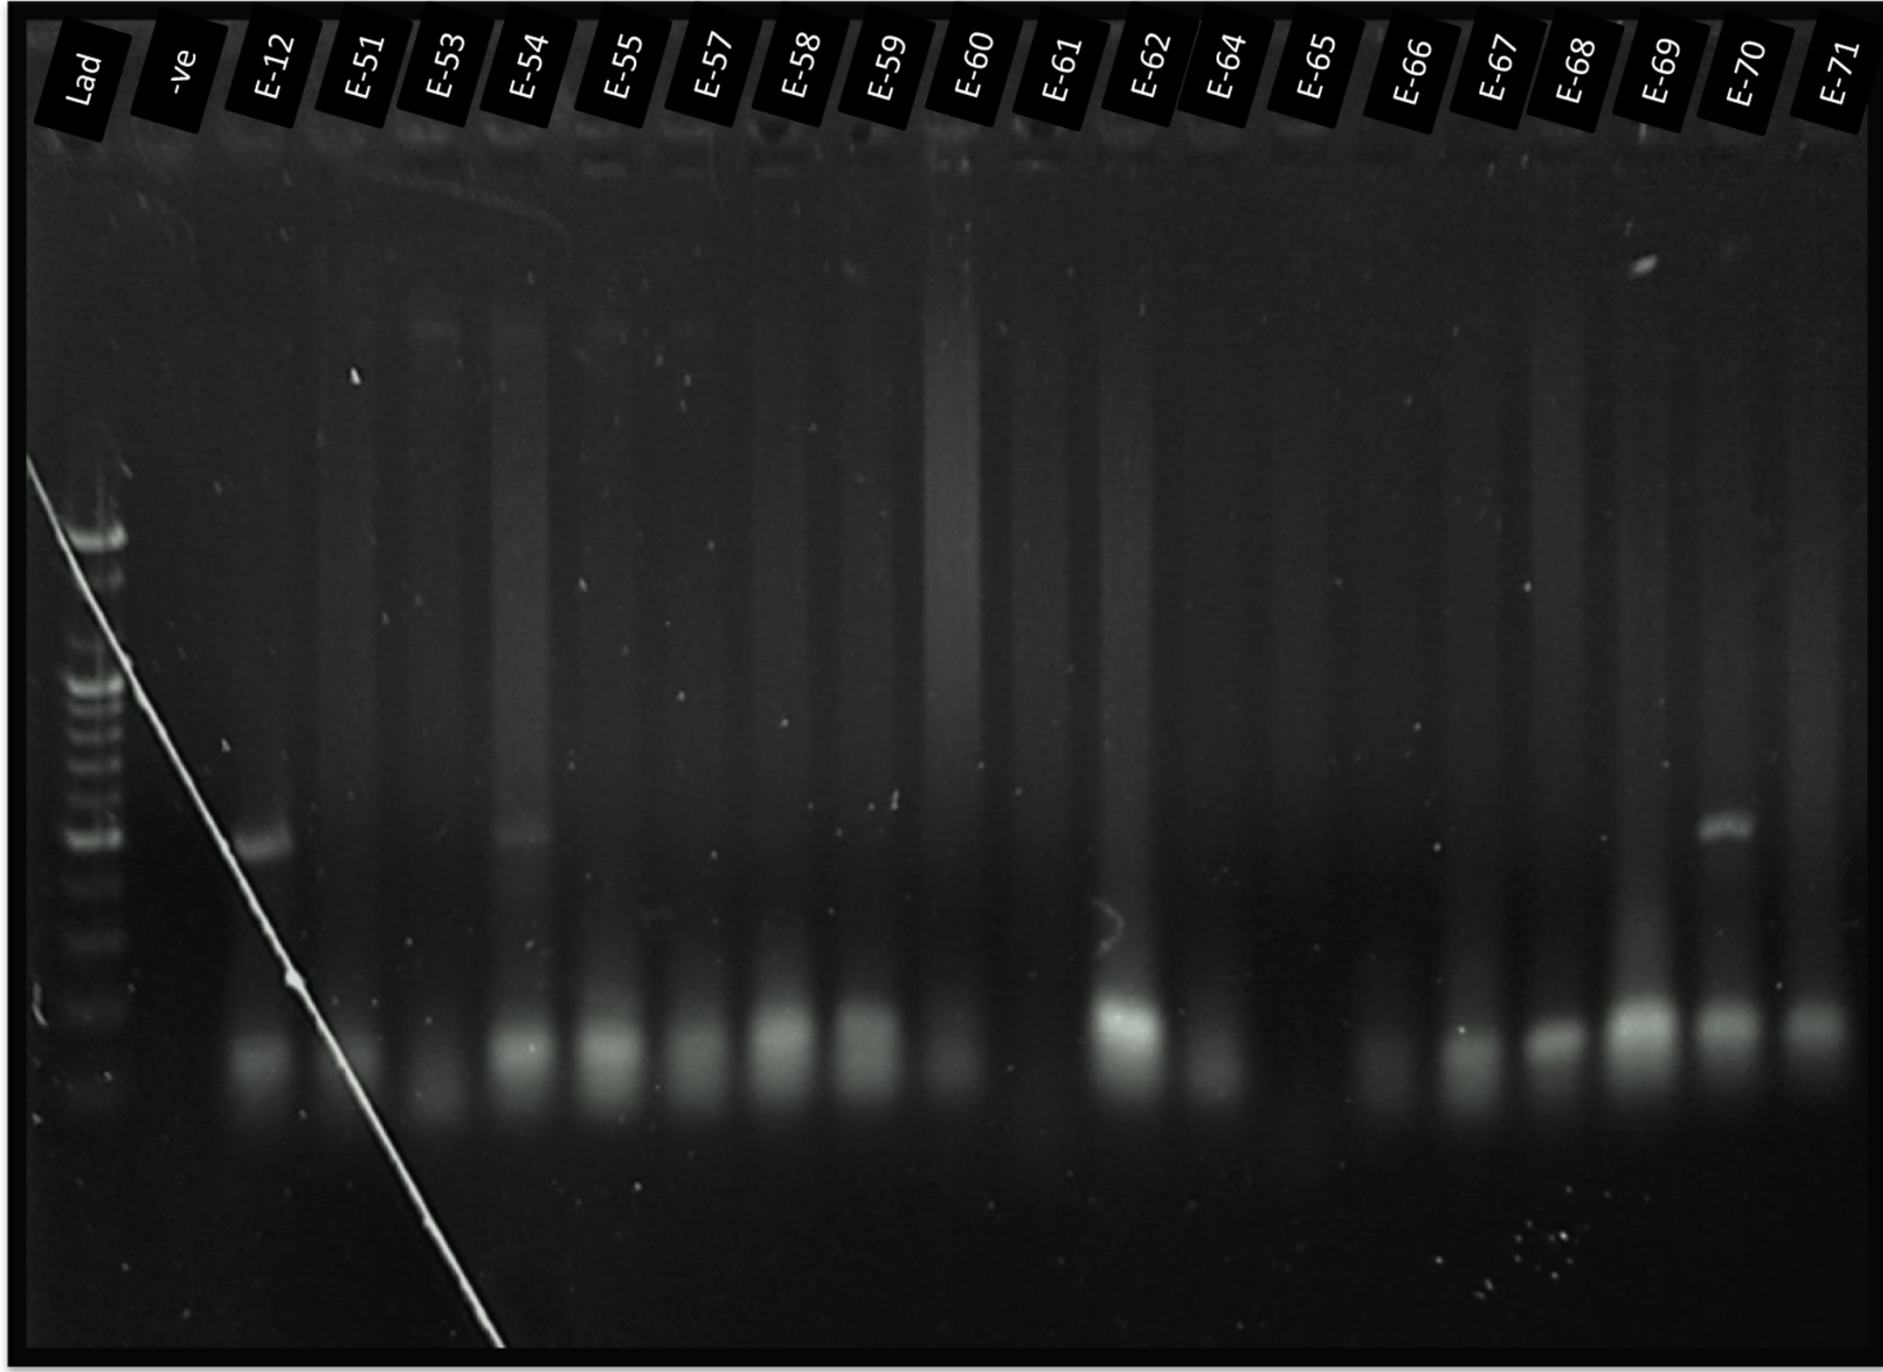

Lad

-ve

E-100

E-101

E-102

E-103

E-104

E-107

E-108

E-109

E-110

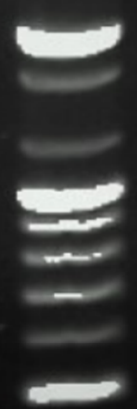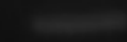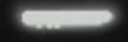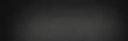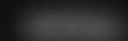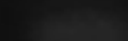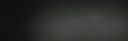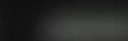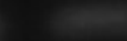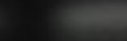



Lad

E-21

-ve con

E-30

E-31

E-33

E-34

E-35

E-37

E-38

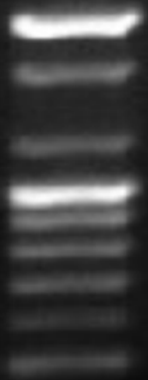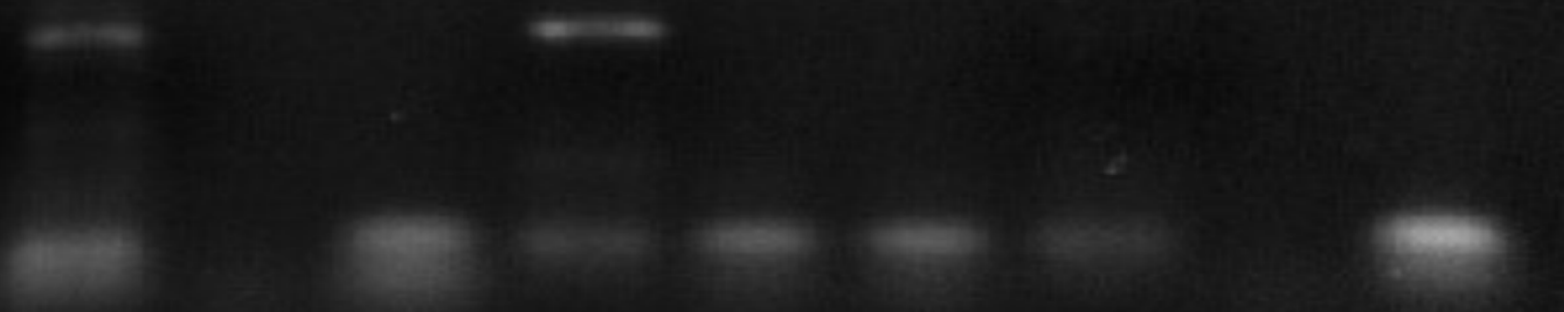

Lad

-ve  
con

E-39

E-40

E-41

E-43

E-45

E-46

E-47

E-48

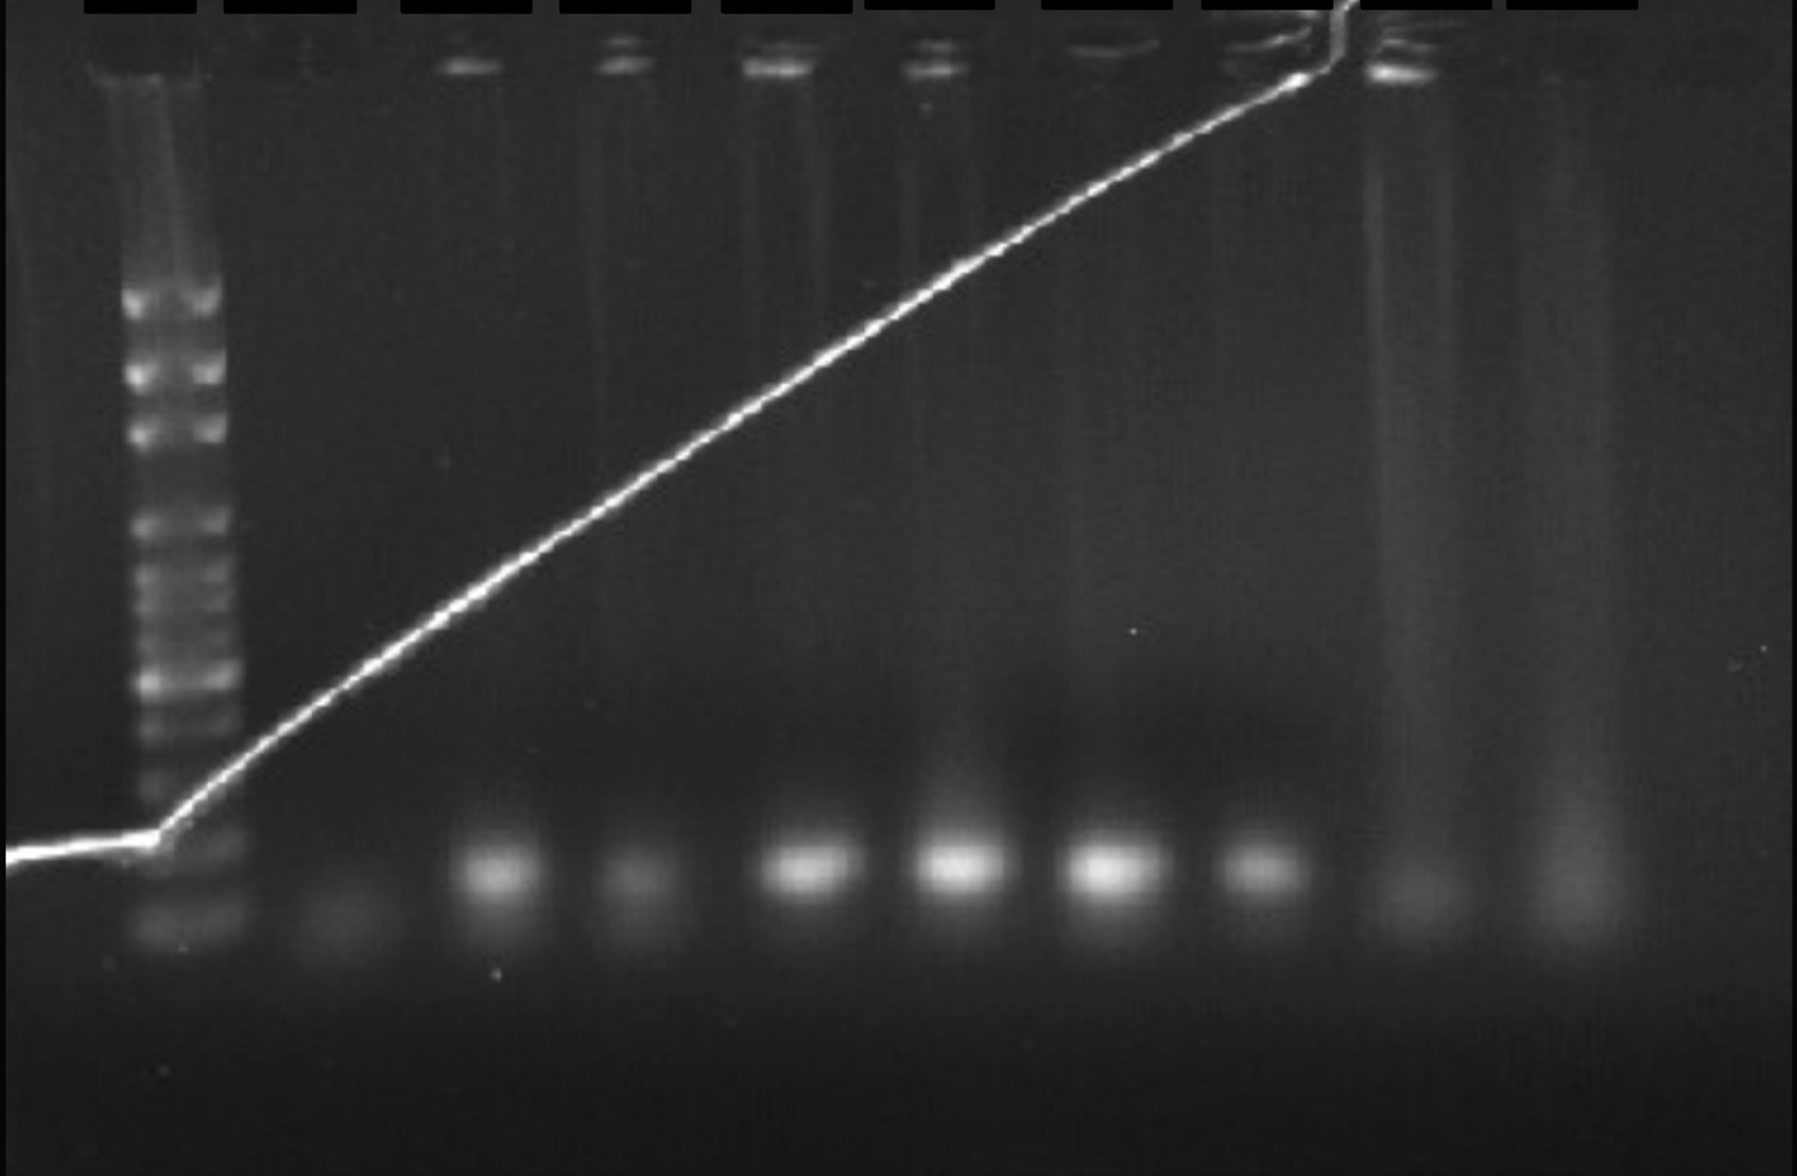

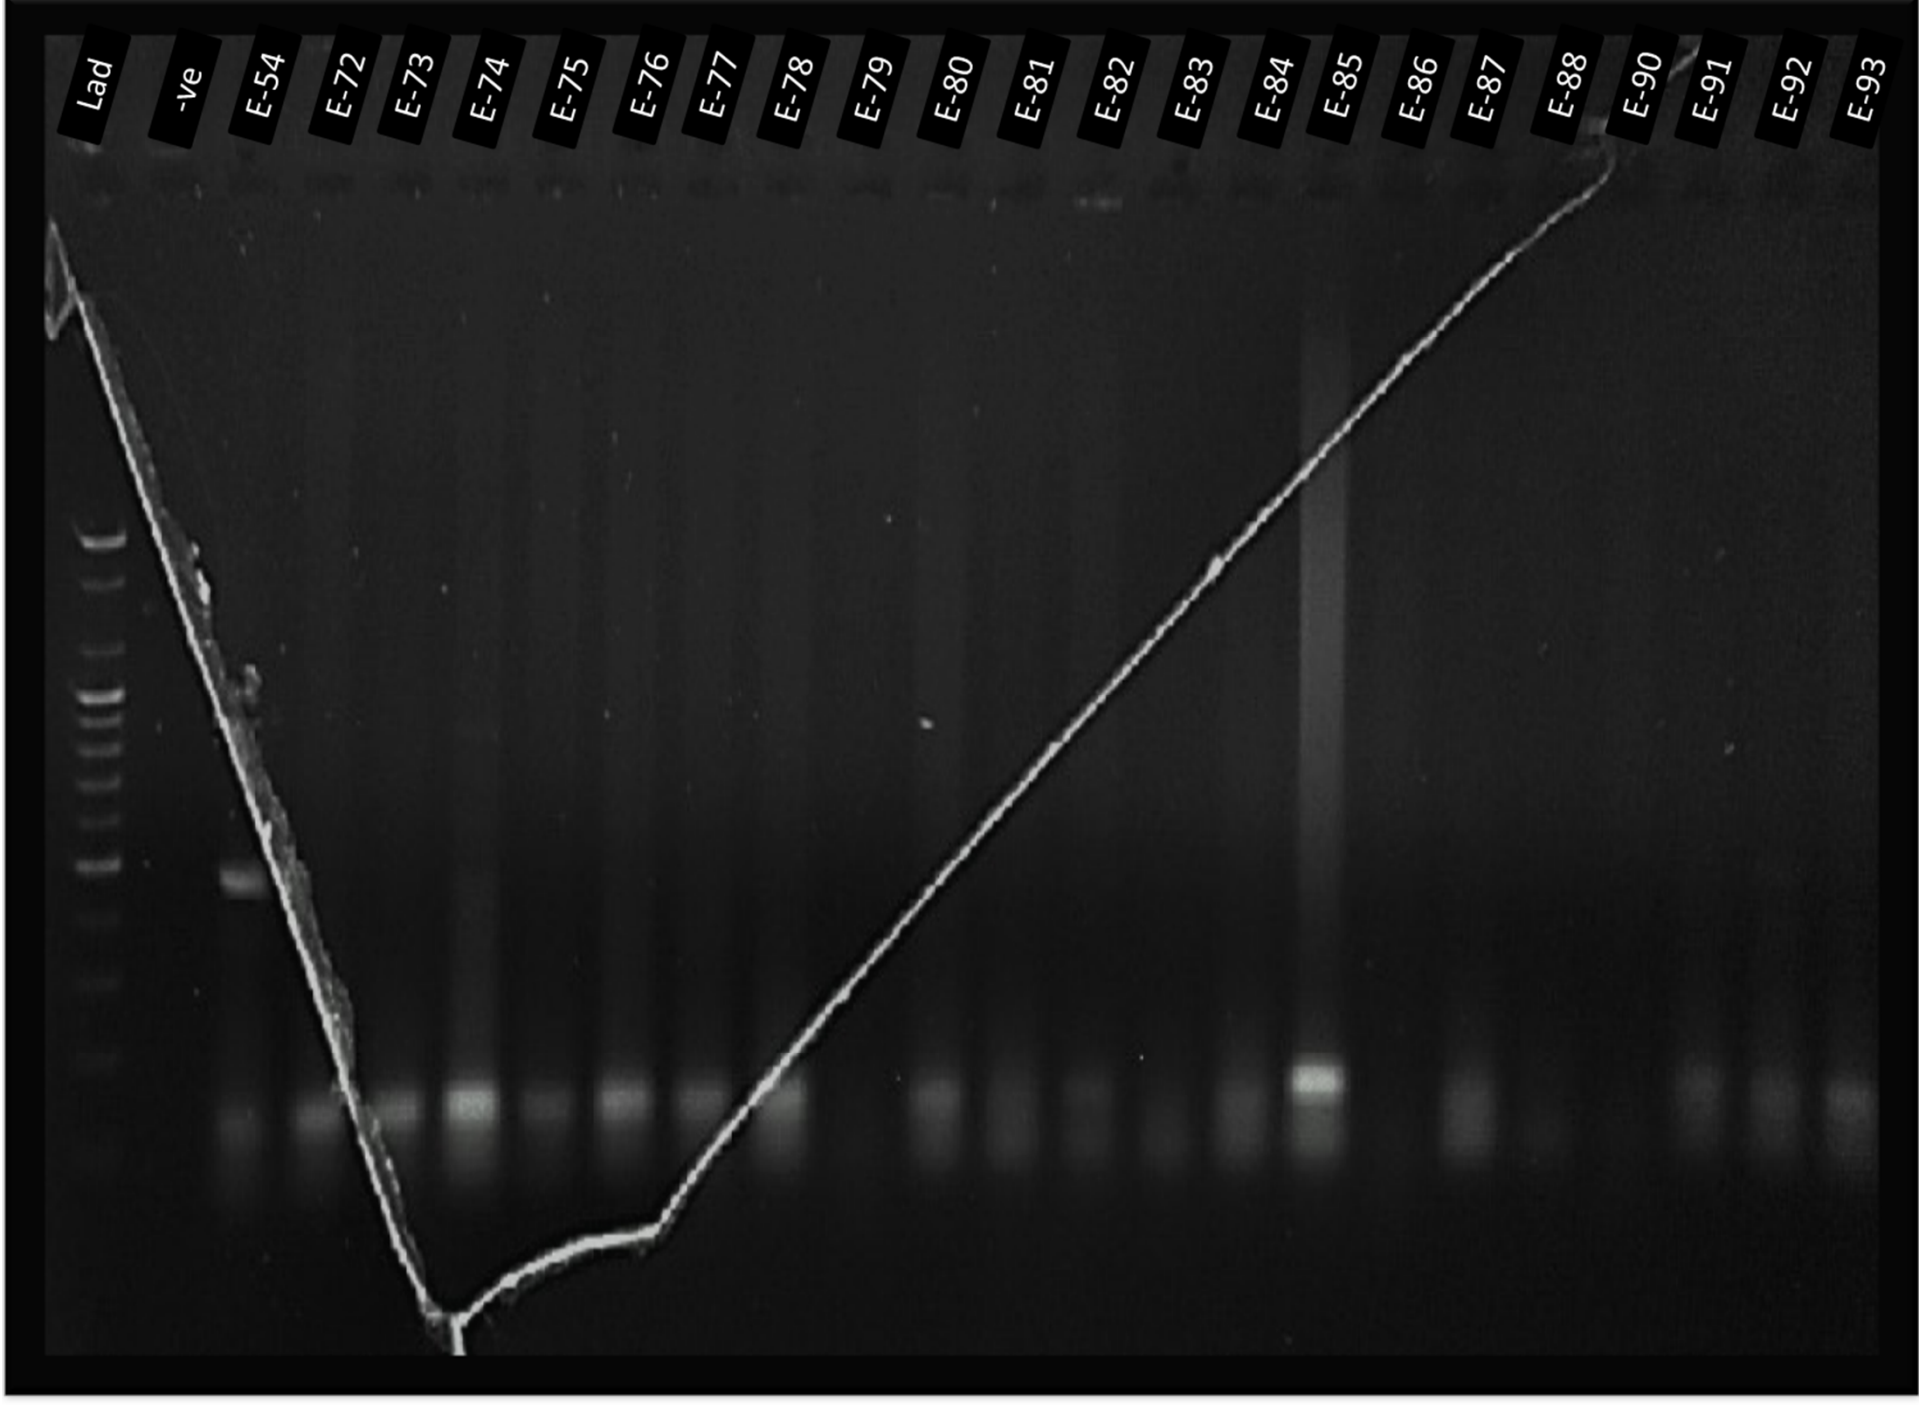





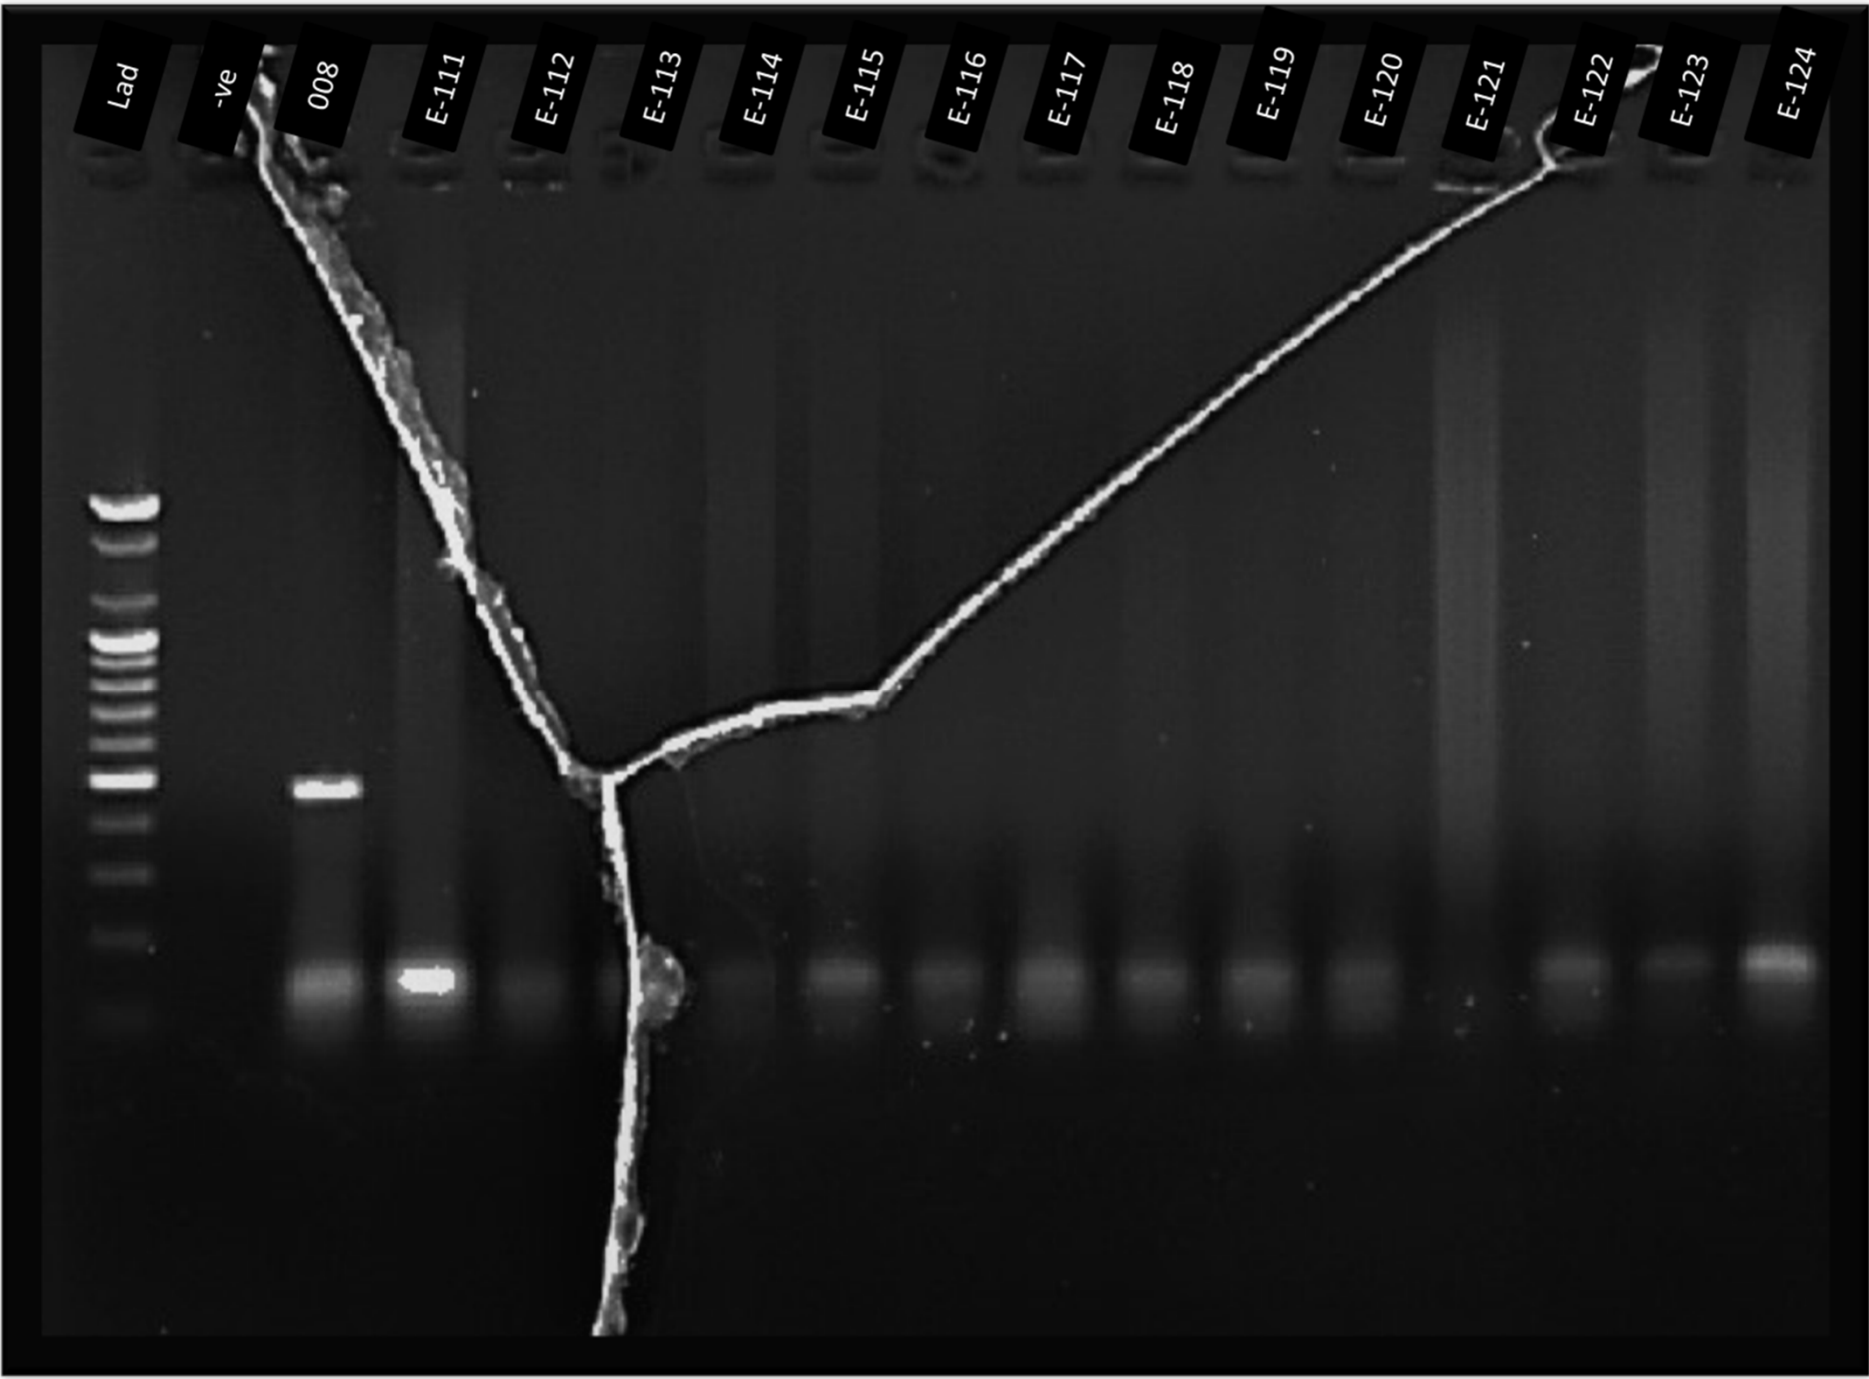

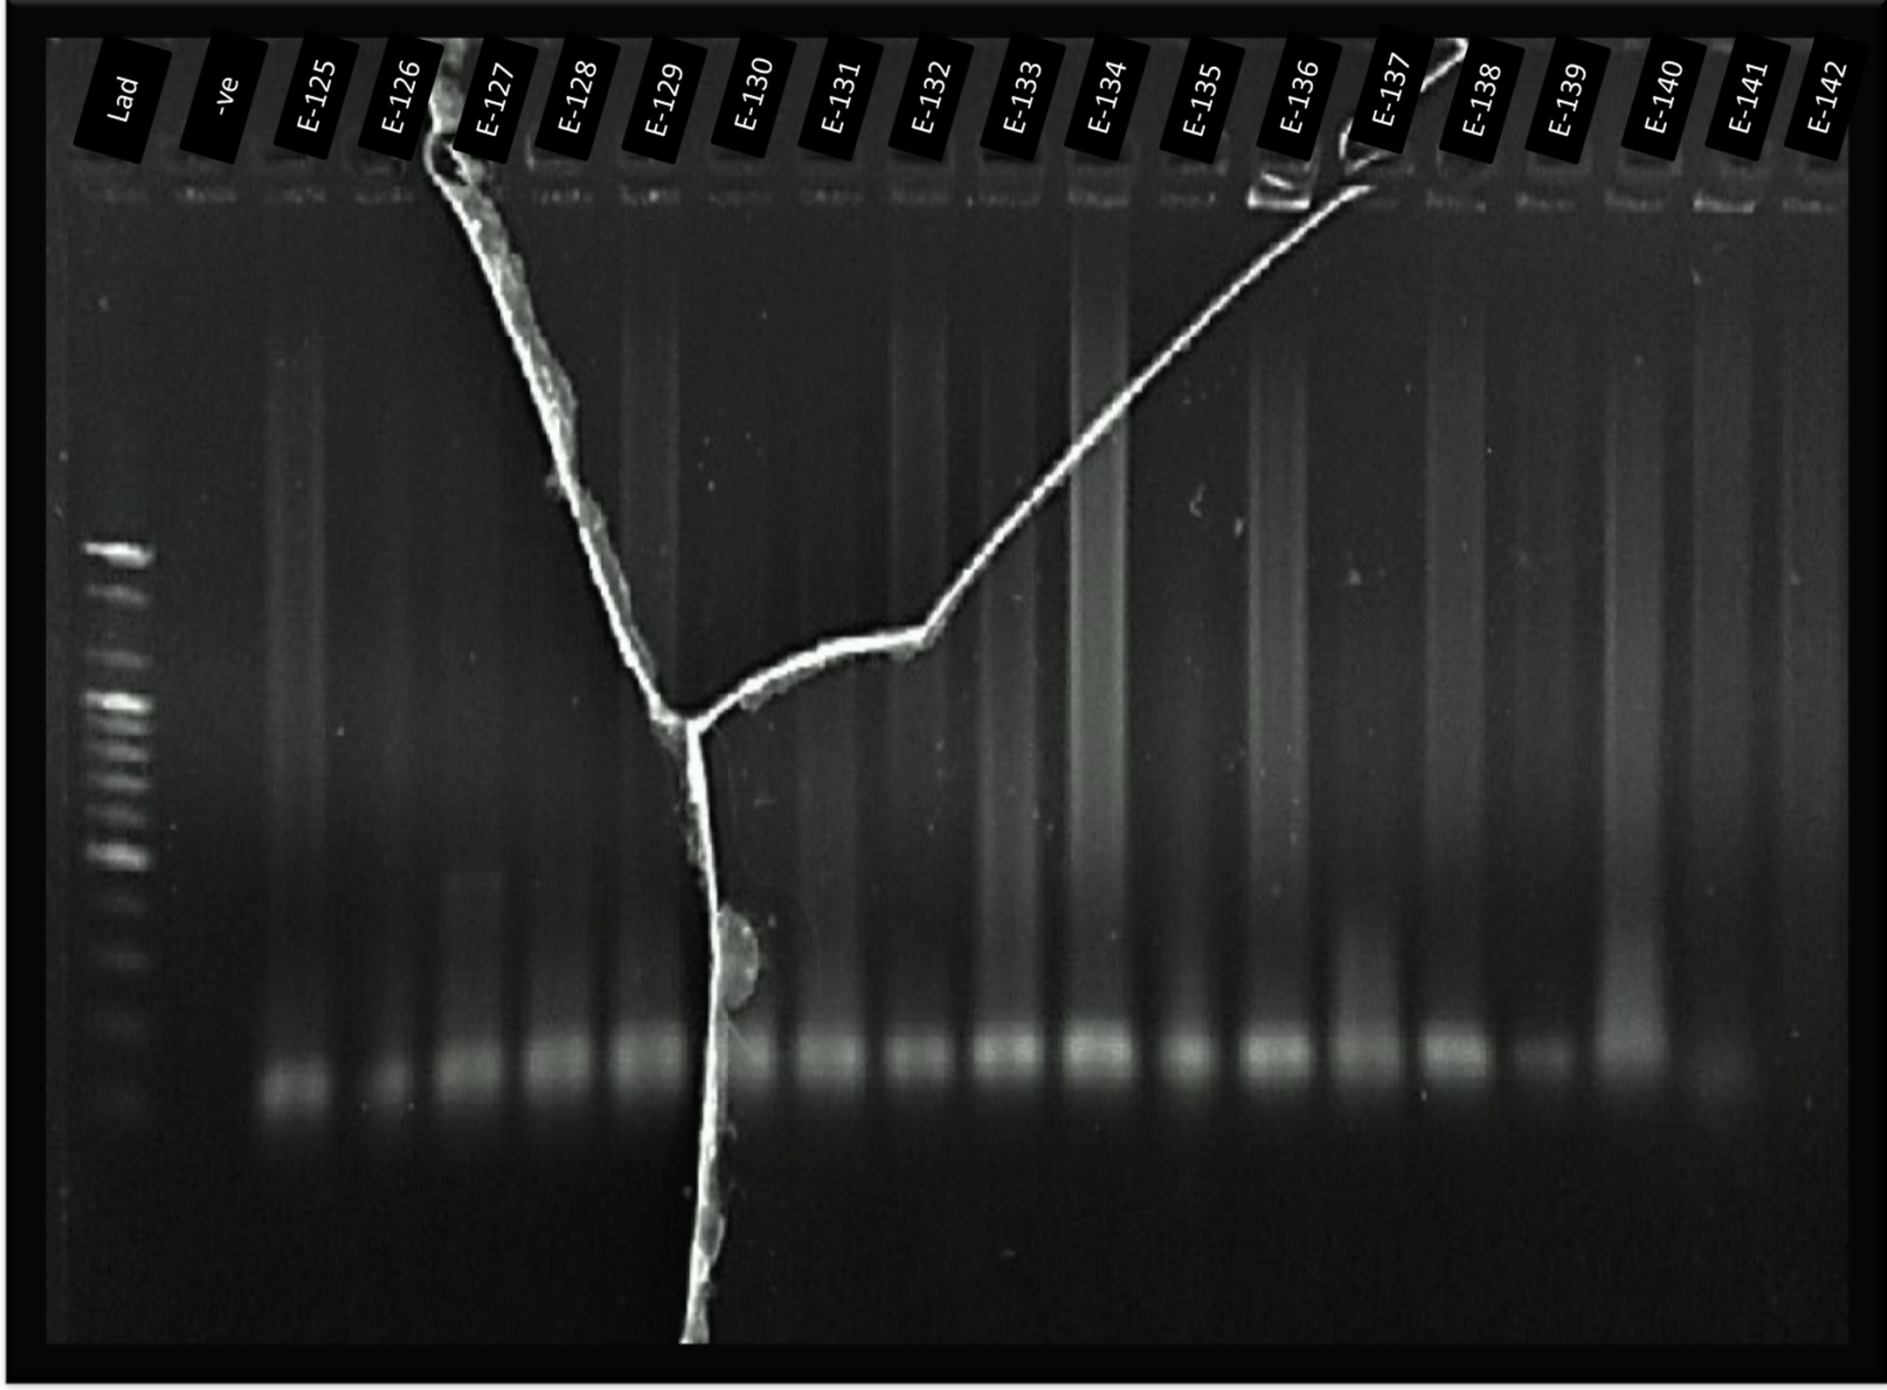

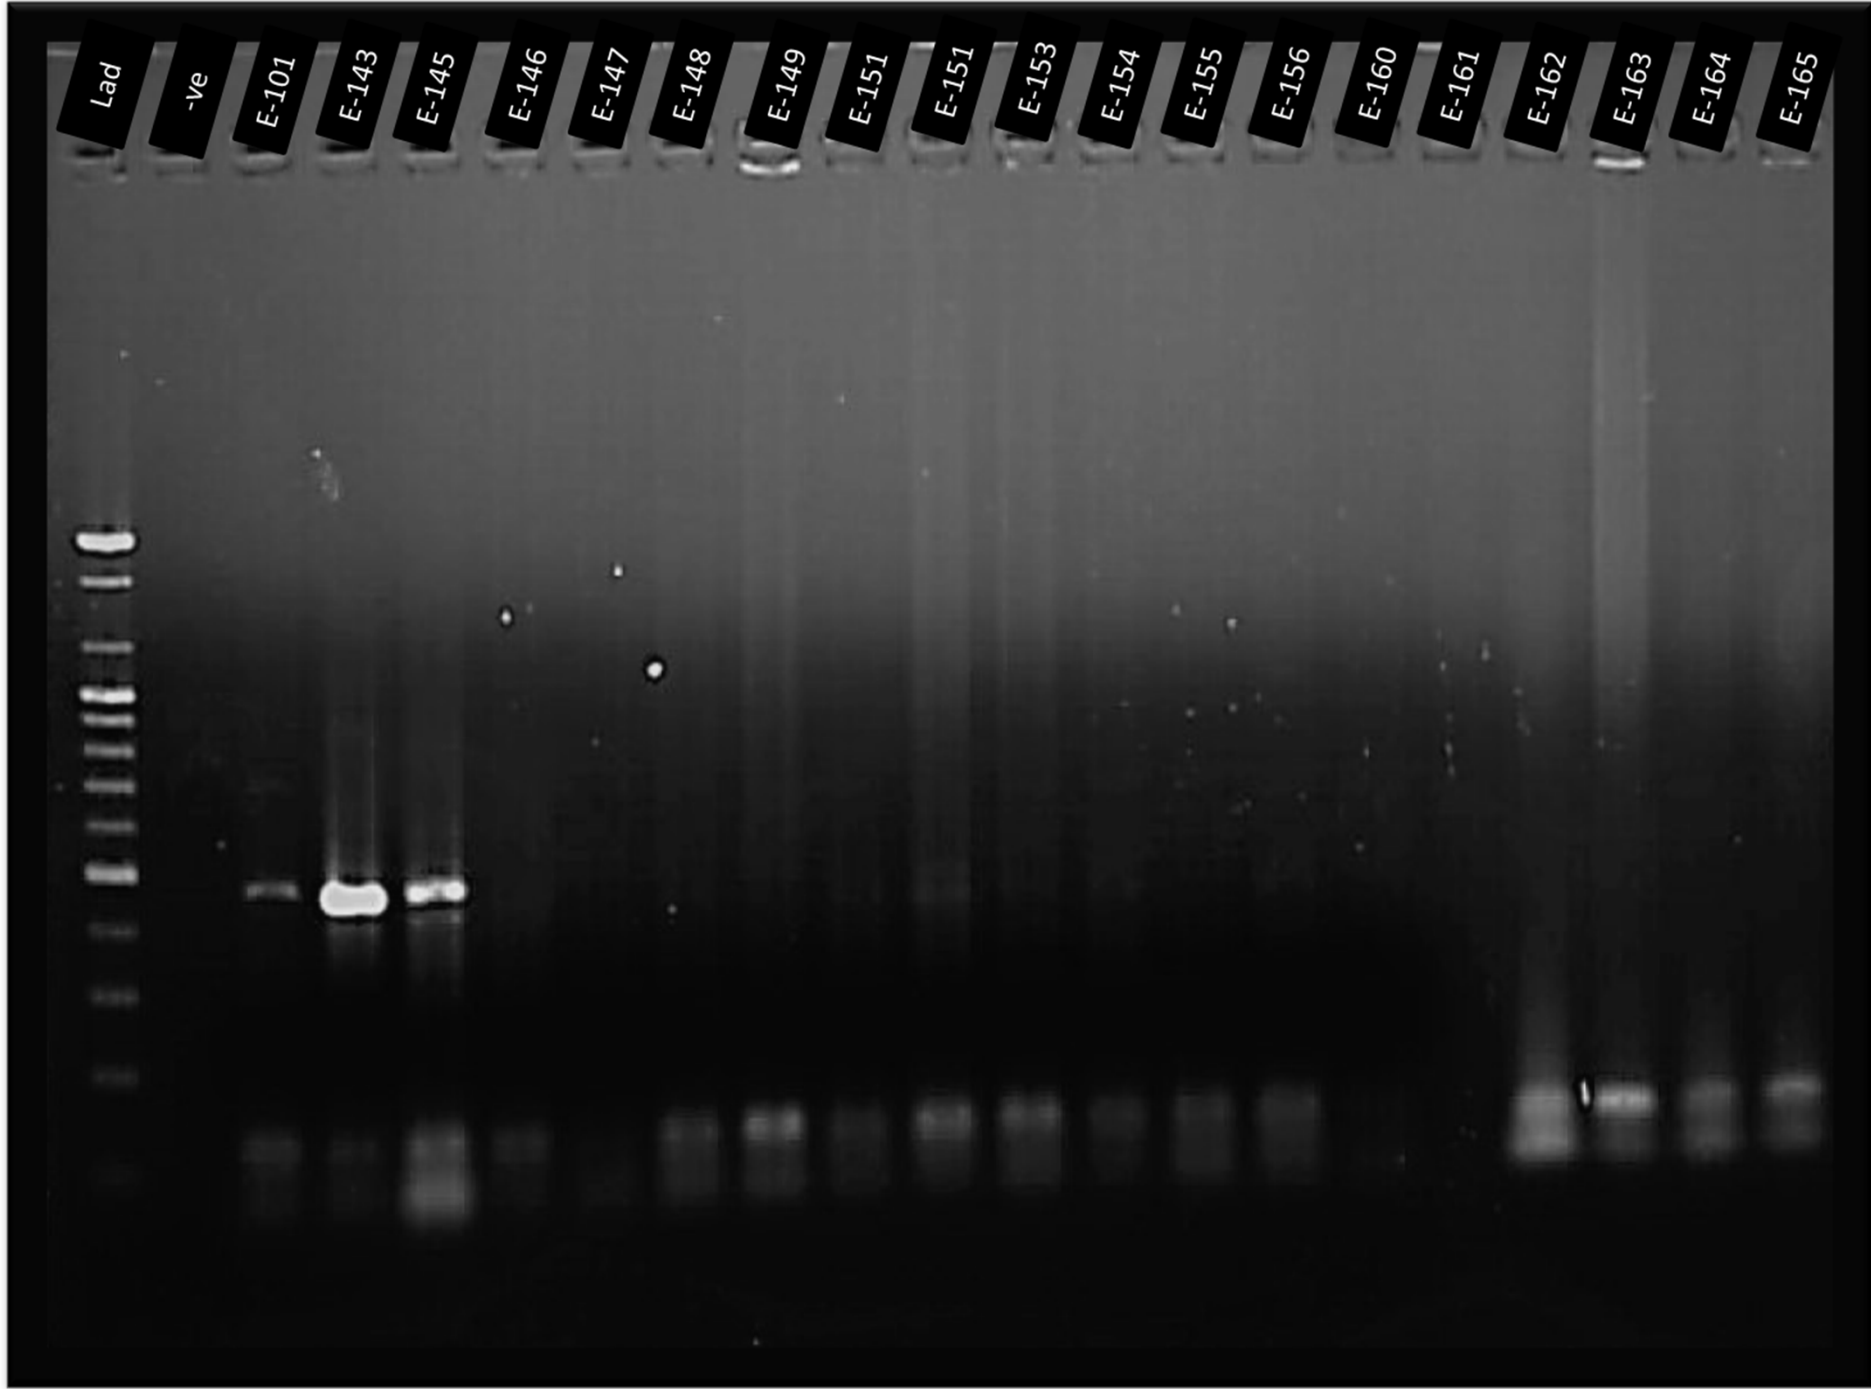

Lad

-ve

E-143

E-169

E-170

E-171

E-172

E-173

E-174

E-175

E-177

E-178

E-179

E-180

E-181

E-182

E-183

E-184

E-185

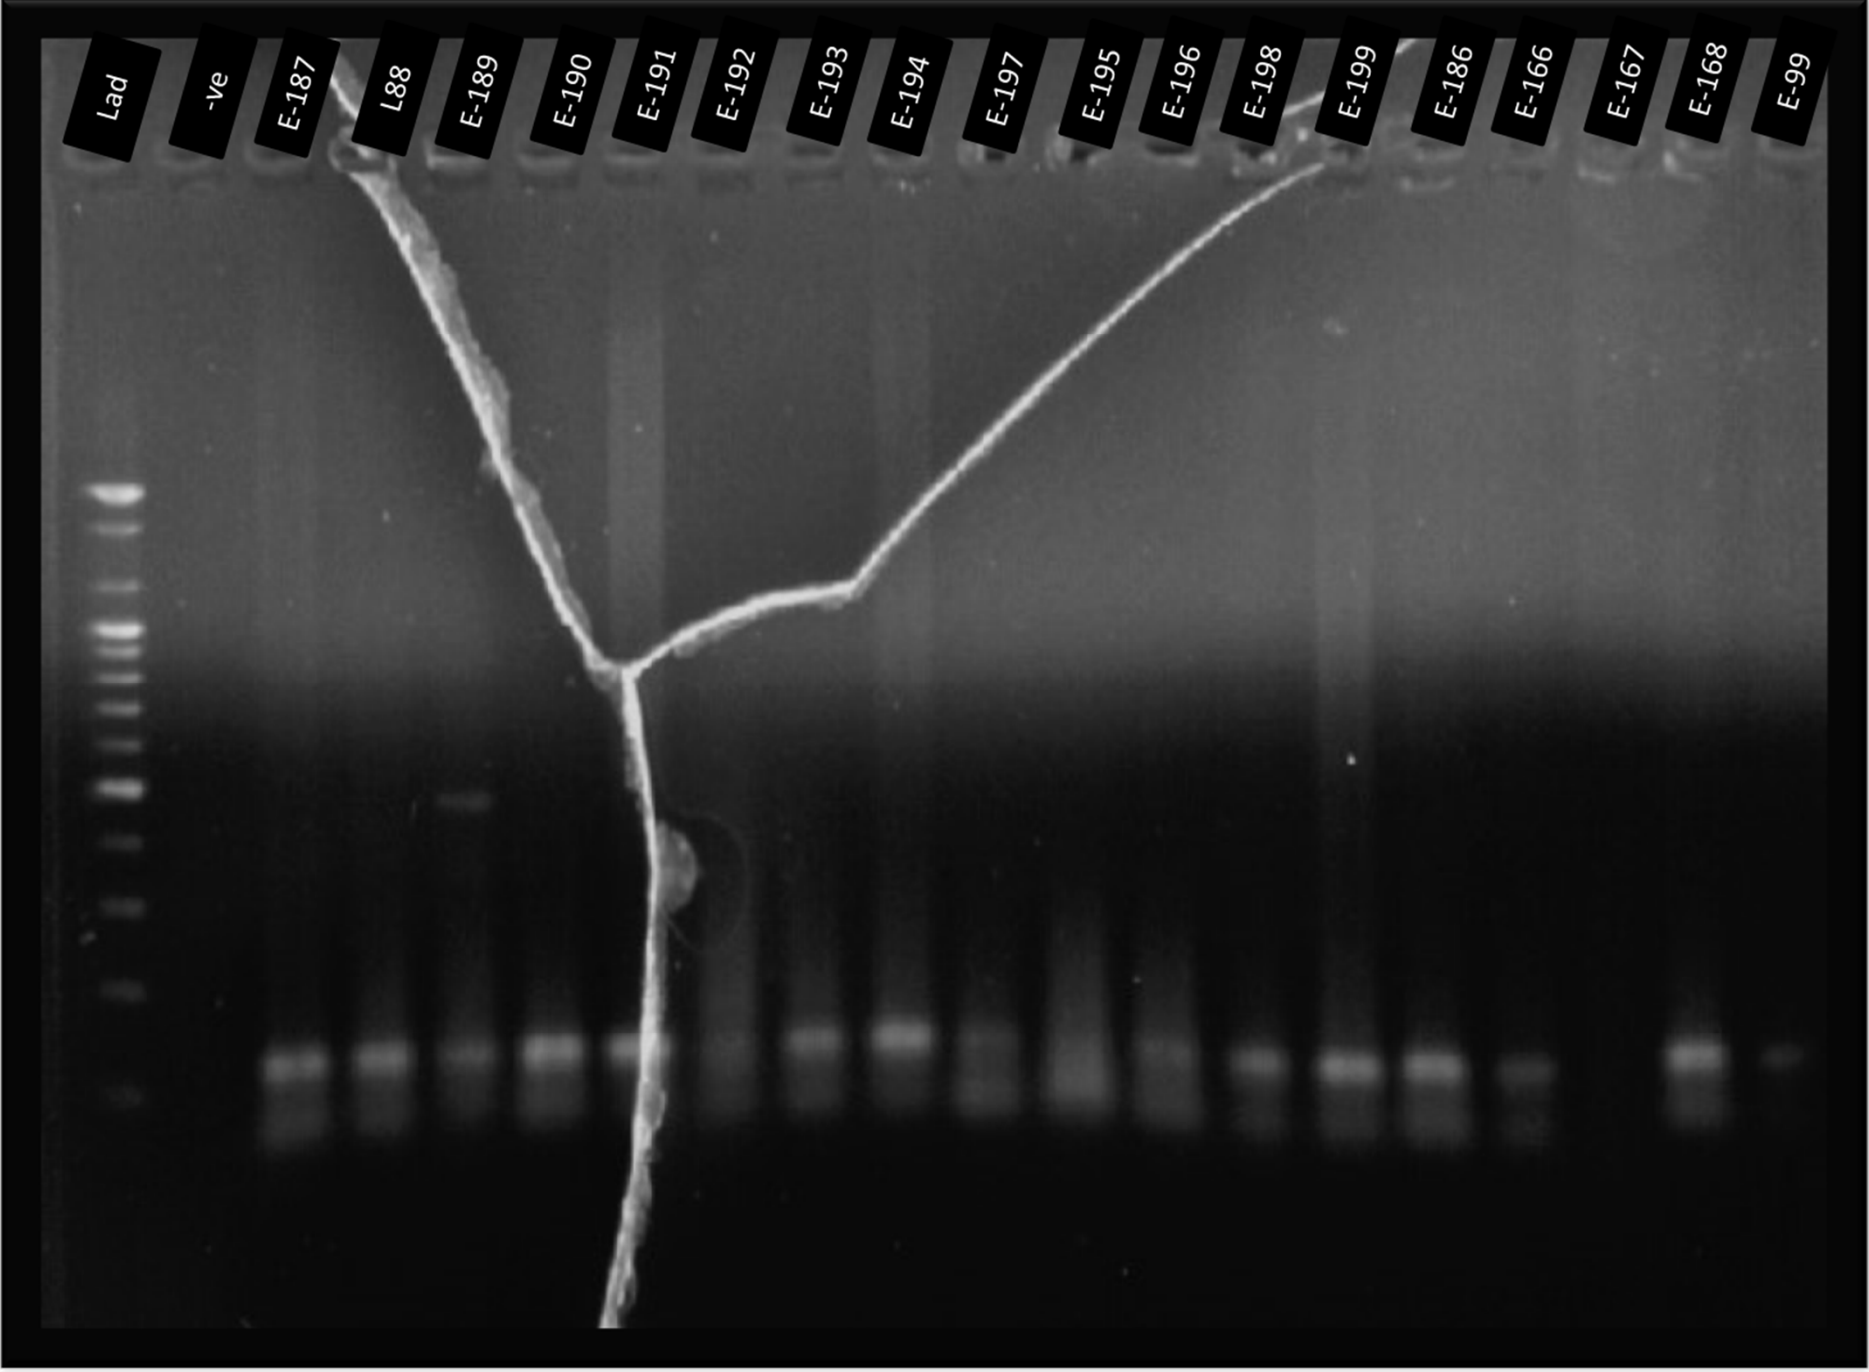

Lad

-ve  
con

E-182

E-200

E-201

E-202

E-203

E-204

E-205

E-206

E-207

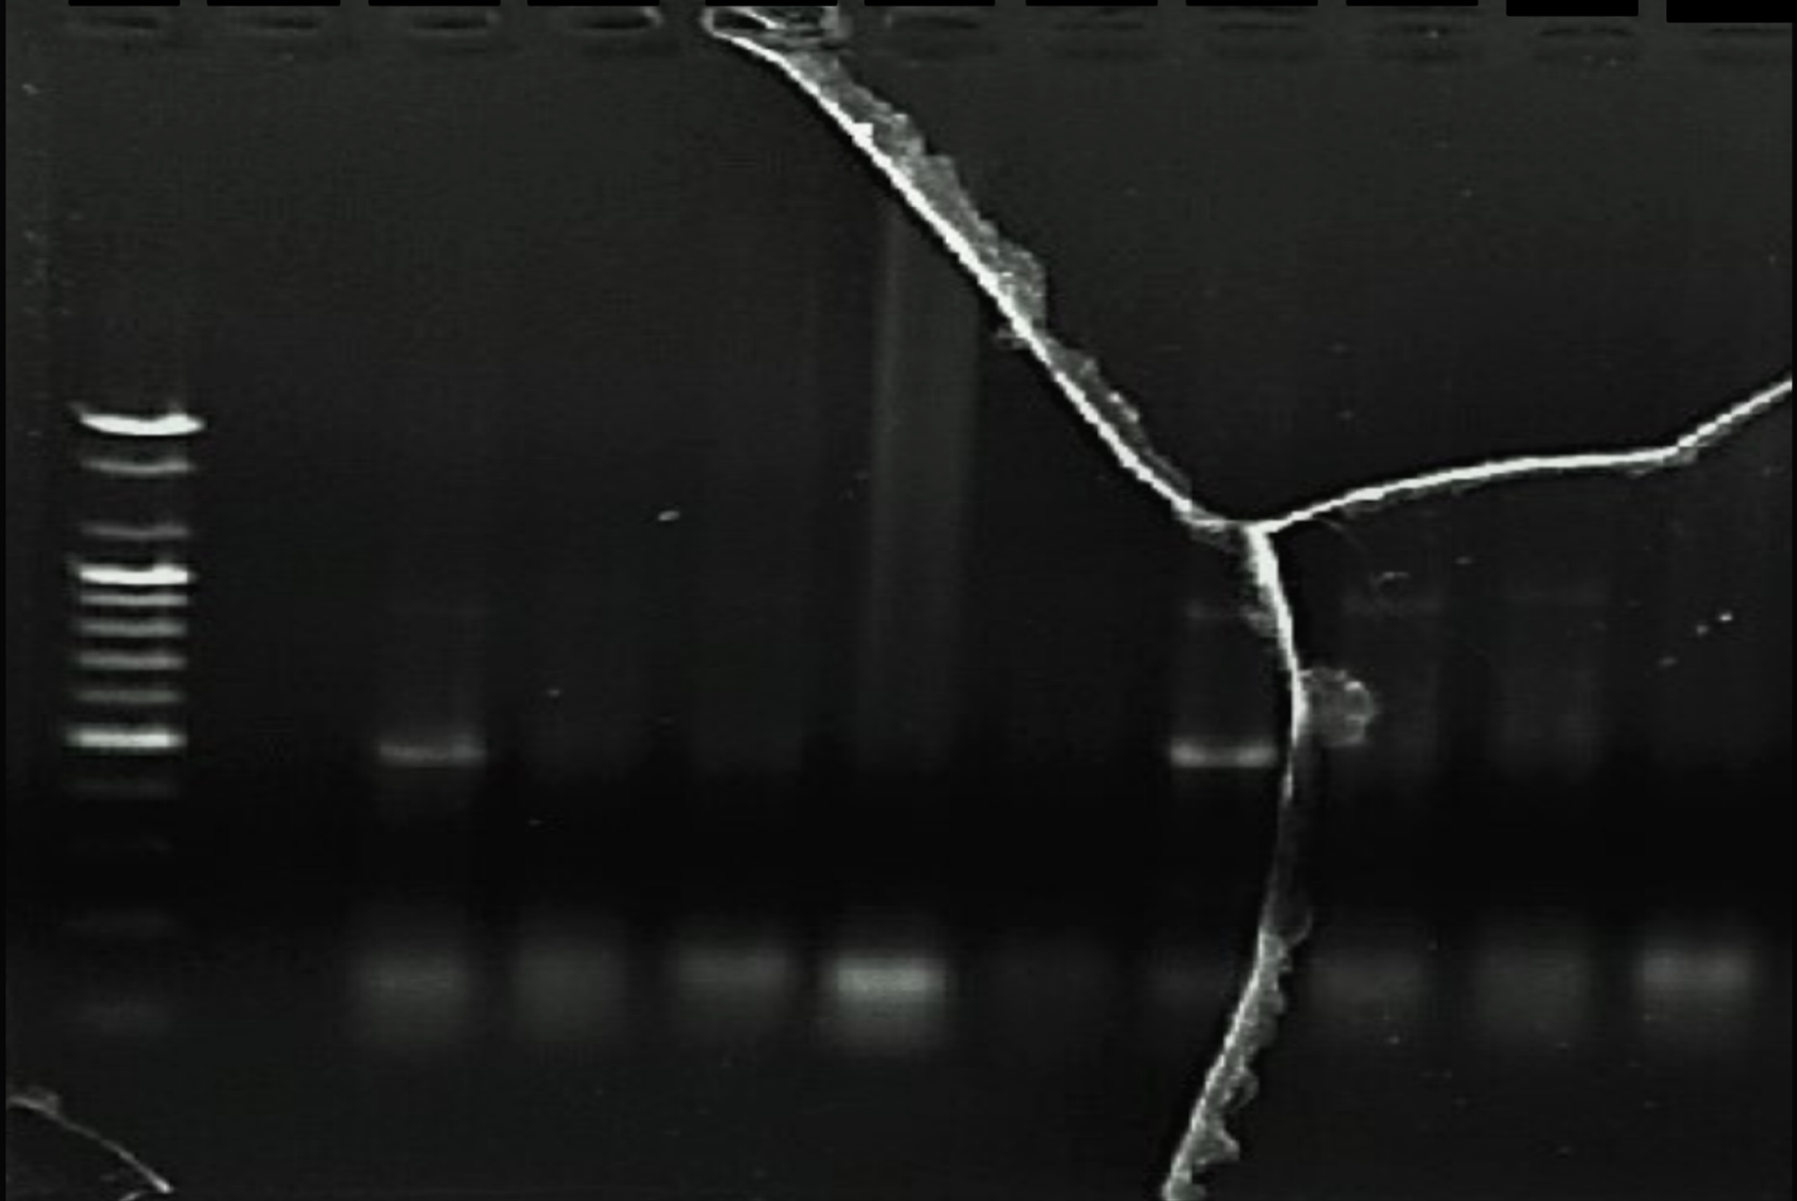

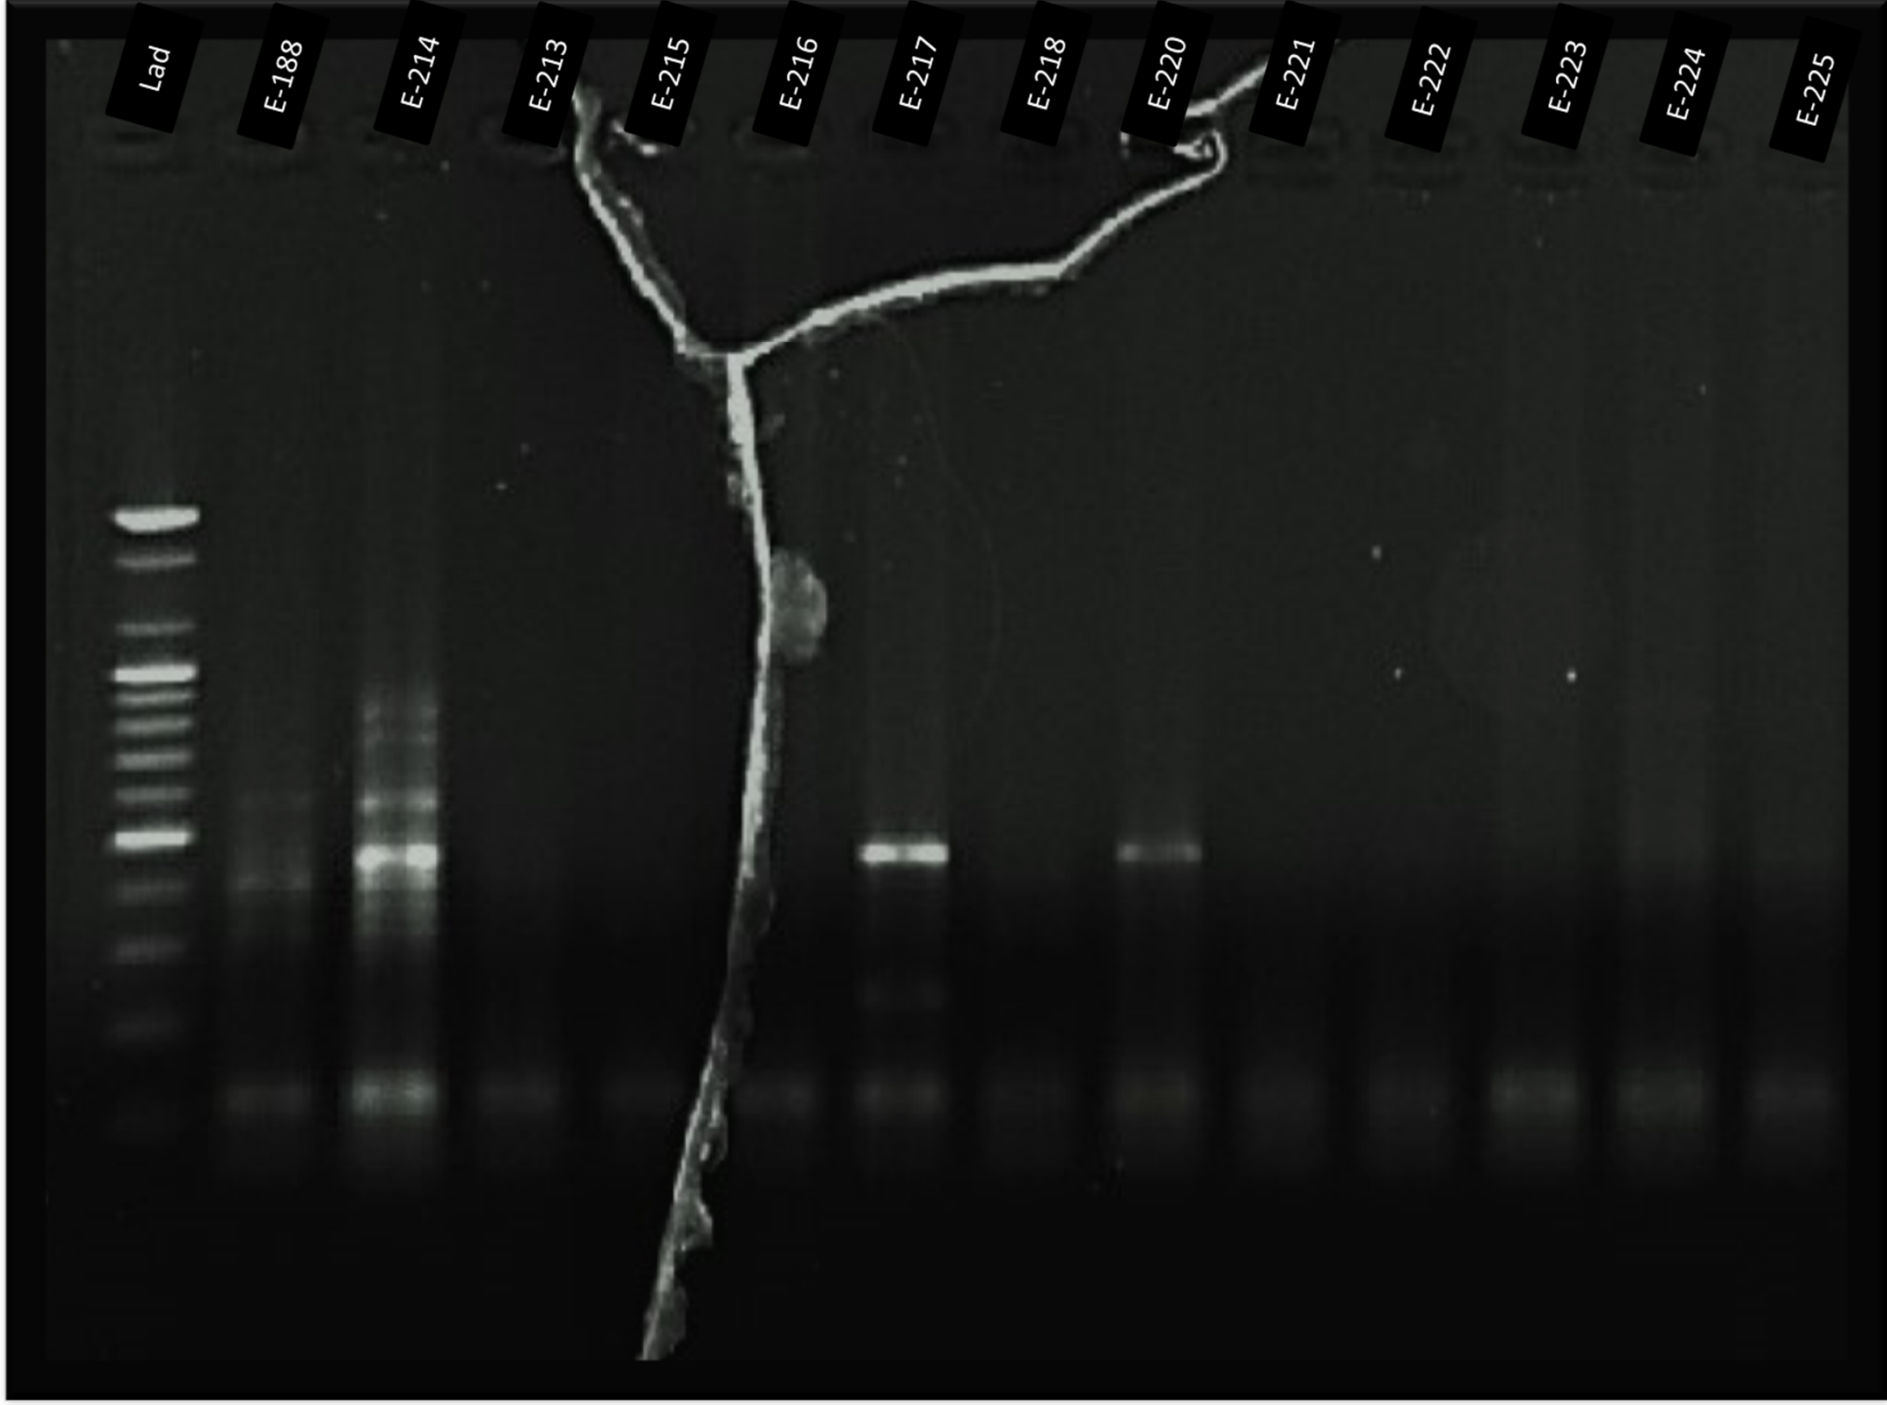



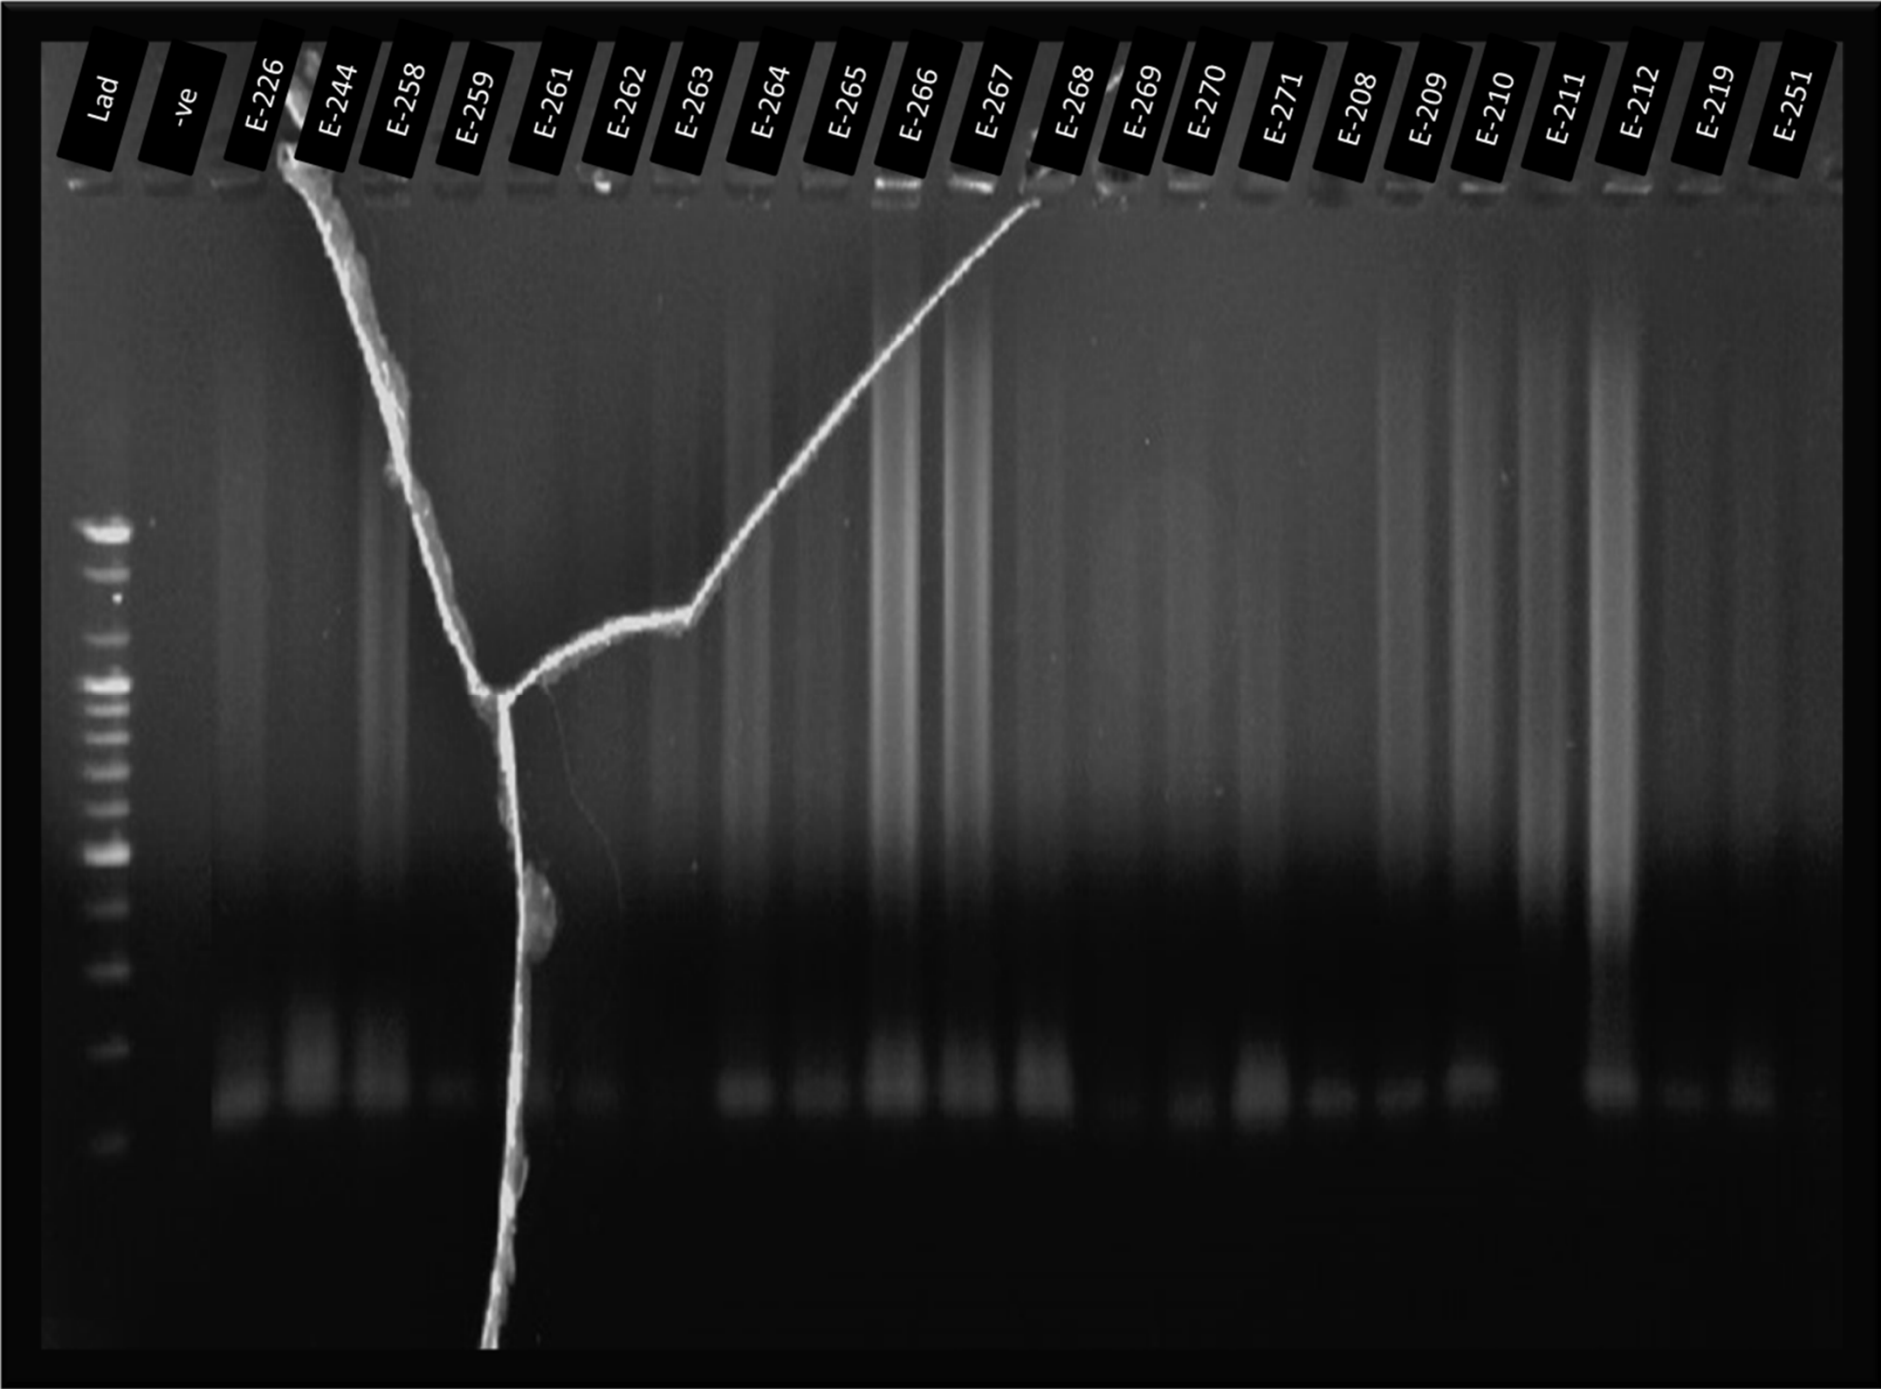

Lad

-ve con

E-245

E-246

E-247

E-248

E-249

E-250

E-251

E-252

E-253

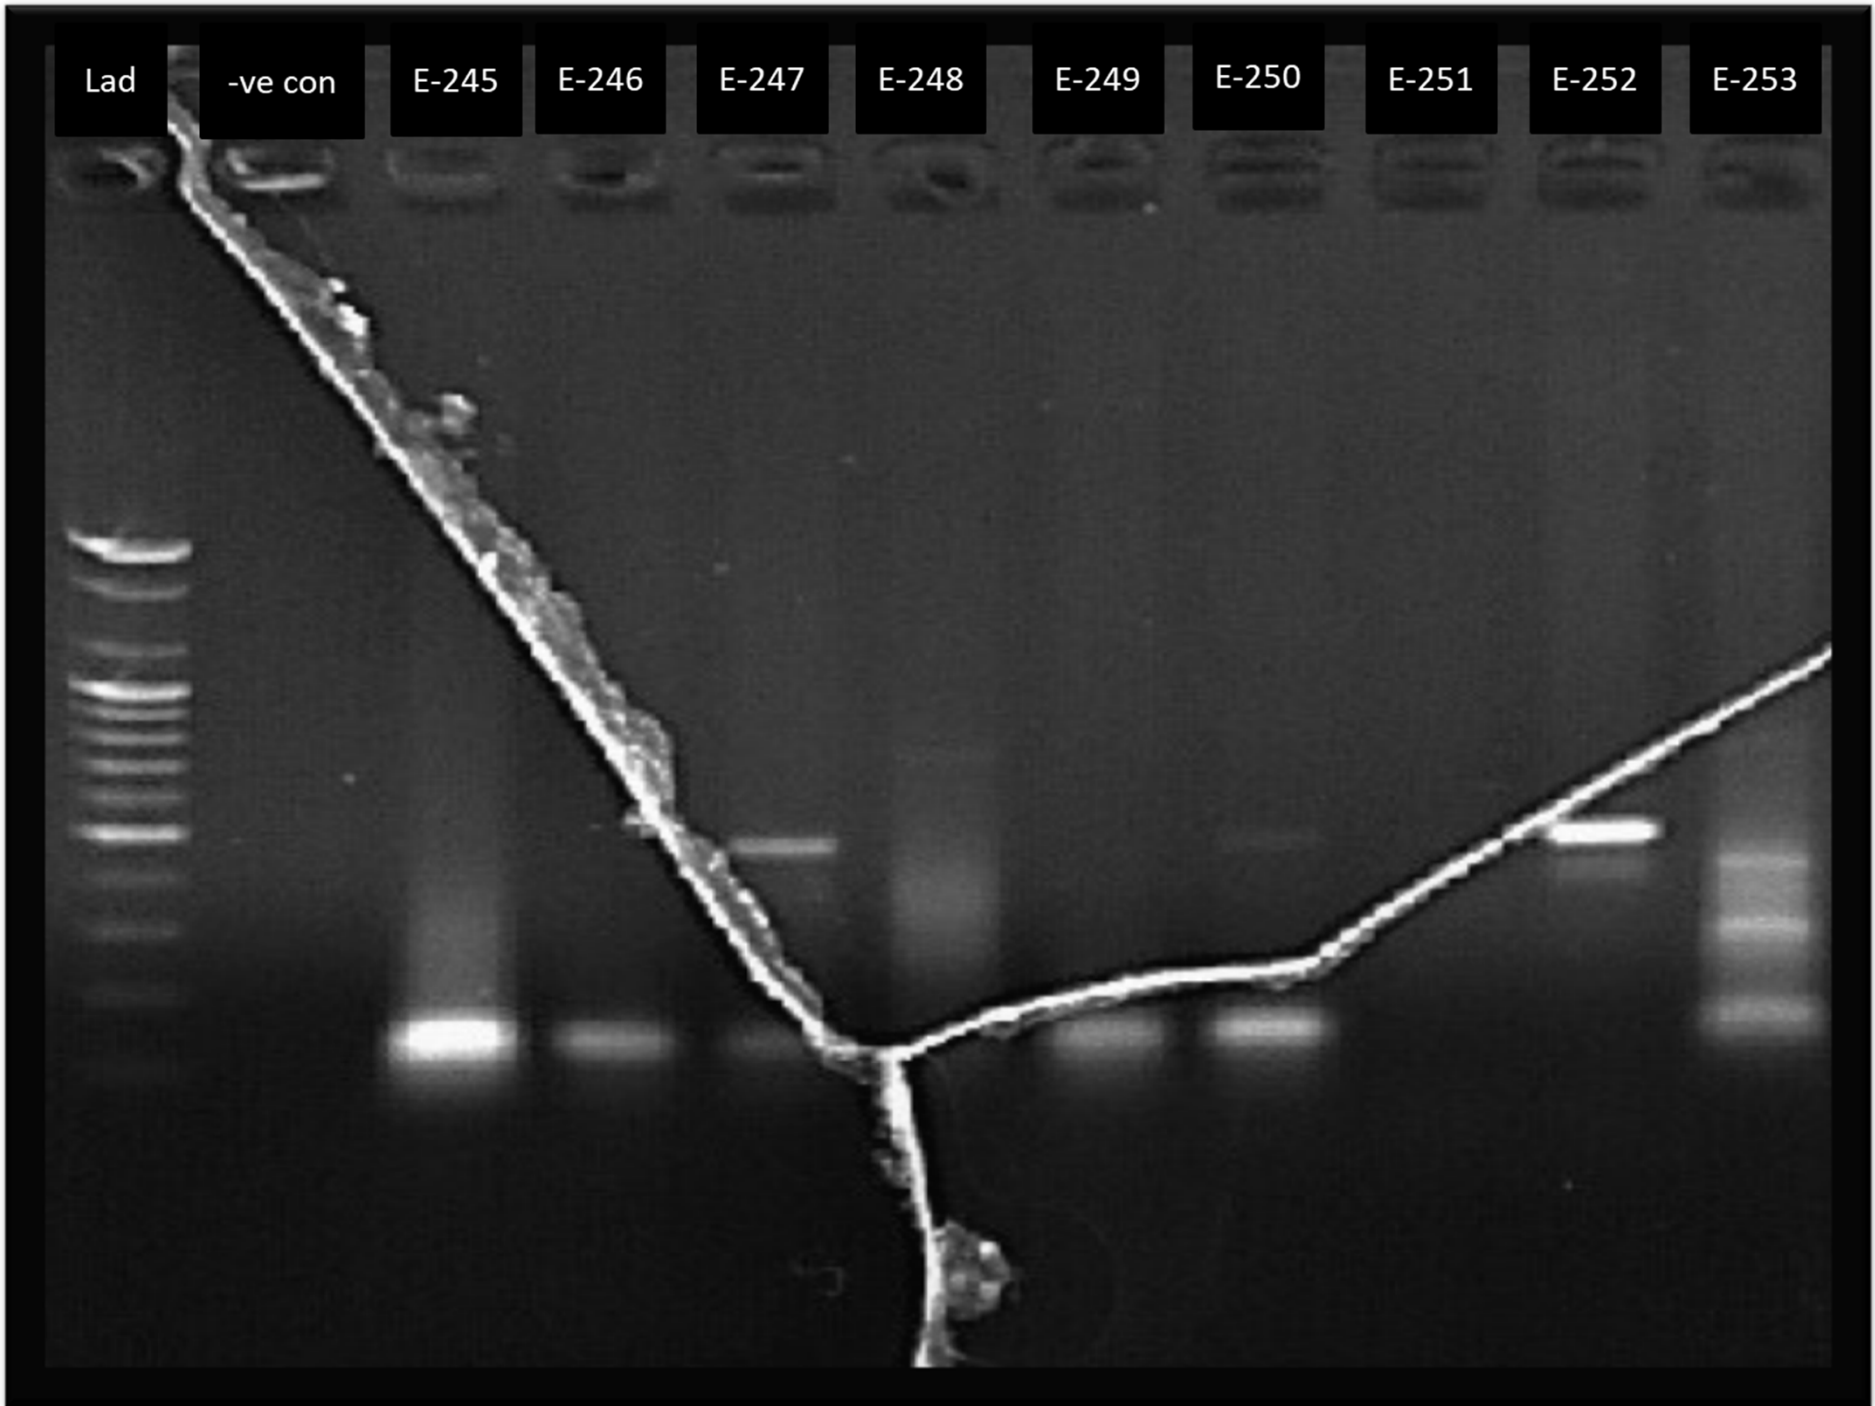

Lad

-ve

E-227

E-228

E-229

E-230

E-231

E-232

E-233

E-234

E-235

E-236

E-237

E-238

E-239

E-240

E-241

E-242

E-243
