# Supplementary material for: Prevalence of human papillomavirus infection and associated factors among women attending cervical cancer screening in setting of Addis Ababa, Ethiopia
Source: PubMed Central journal article supplement (PMC10876560; doi:10.1038/s41598-024-54754-x), 2024-02-19
Supplement: 41598_2024_54754_MOESM2_ESM.pdf [file 41598_2024_54754_MOESM2_ESM.pdf]

## Supplementary File 2

### Questionnaire (English version)

DILLA UNIVERSITY

SCHOOL OF GRADUATE STUDIES

COLLEGE OF NATURAL AND COMPUTATIONAL SCIENCES

DEPARTMENT OF BIOLOGY

#### Questionnaire

**Introduction:** Dear respondents, this questionnaire is prepared as an instrument to conduct an academic research on the topic entitled Human papillomavirus and *Chlamydia trachomatis* prevalence among women attending cervical cancer screening at Family Guidance Association of Ethiopia, Addis Ababa clinic. The information you will provide is very useful for successful accomplishment of this study. It is your full right to participate, withdraw or refuse in the participation of this study. All of your answers will be kept confidential. I will assure you that there will be no problem regarding with the participation of this study. Therefore you are kindly requested to provide consent of participation.

Would you be willing to answer the questions?

Yes  2. No

Thank you for giving your time and agreeing. If there are any questions that you want to ask, please do not hesitate to ask at any time.

| No                                | Questioner       | Answer  |  |
|-----------------------------------|------------------|---------|--|
| <b>I- Socio-demographics data</b> |                  |         |  |
| 1                                 | How old are you? | 16 – 25 |  |
|                                   |                  | 26 – 35 |  |

|    |                                                         |                                  |  |
|----|---------------------------------------------------------|----------------------------------|--|
|    |                                                         | Above 36                         |  |
| 2  | What is your marital status?                            | Married                          |  |
|    |                                                         | Single                           |  |
|    |                                                         | Divorced                         |  |
|    |                                                         | Widowed                          |  |
|    |                                                         | Other:                           |  |
| 3. | What is the highest standard of education attained?     | None                             |  |
|    |                                                         | Read and write                   |  |
|    |                                                         | Primary (1-8)                    |  |
|    |                                                         | Grade 9-12                       |  |
|    |                                                         | Certificate                      |  |
|    |                                                         | Diploma                          |  |
|    |                                                         | 1 <sup>st</sup> Degree and above |  |
| 4  | How can you describe your employment status at present? | Employed full-time               |  |
|    |                                                         | Employed part-time               |  |
|    |                                                         | Unemployed                       |  |
|    |                                                         | Student                          |  |
|    |                                                         | Other:                           |  |
| 4A | How much do you earn per month?                         | 500 and less Birr                |  |
|    |                                                         | 501-1500 Birr                    |  |
|    |                                                         | 1501-3000 Birr                   |  |
|    |                                                         | More than 3000 Birr              |  |

| <b>II- Behavioral characteristics data</b>    |                                                                                  |                  |  |
|-----------------------------------------------|----------------------------------------------------------------------------------|------------------|--|
| 5                                             | Have you ever used alcohol?                                                      | Yes              |  |
|                                               |                                                                                  | No               |  |
| 5A                                            | How often did you have at least one drink of any alcoholic beverage?             | Per days         |  |
|                                               |                                                                                  | Per weak         |  |
|                                               |                                                                                  | Per month        |  |
|                                               |                                                                                  | During festival  |  |
| 6                                             | Have you ever used any form of tobacco (cigarettes, pipes, cigars, chew, snuff)? | Yes              |  |
|                                               |                                                                                  | No               |  |
| 6A                                            | If answer to Q. 6 is -yes   how many years have you smoked tobacco?              | 3- 6 Month       |  |
|                                               |                                                                                  | 1-3 year         |  |
|                                               |                                                                                  | 4-5 Year         |  |
|                                               |                                                                                  | More than 5 year |  |
| 6B                                            | Do you smoke tobacco now?                                                        | Yes              |  |
|                                               |                                                                                  | No               |  |
| <b>III- Reproductive characteristics data</b> |                                                                                  |                  |  |
| 7                                             | Have you ever had a sexual intercourse?                                          | Yes              |  |
|                                               |                                                                                  | No               |  |
| 7A                                            | How old were you when you first had sex?                                         | 12-17            |  |
|                                               |                                                                                  | 18-23            |  |
|                                               |                                                                                  | Above 24         |  |
| 7B                                            | In your life, what is the number of men                                          | 1                |  |

|     |                                                                        |                                    |  |
|-----|------------------------------------------------------------------------|------------------------------------|--|
|     | with whom you have had sex?                                            | 2 – 4                              |  |
|     |                                                                        | More than 4                        |  |
| 8   | Are you on any method of contraception?                                | Yes                                |  |
|     |                                                                        | No                                 |  |
| 8A  | If answer to Q. 8 is -yes   specify method.                            | Pills                              |  |
|     |                                                                        | Injectable Depo                    |  |
|     |                                                                        | Implant                            |  |
|     |                                                                        | Condom                             |  |
|     |                                                                        | IUD (loop)                         |  |
|     |                                                                        | Levonelle/ emergency contraceptive |  |
|     |                                                                        | Other:                             |  |
| 9   | Have you ever been pregnant?                                           | Yes                                |  |
|     |                                                                        | No                                 |  |
| 9A  | If answer to Q.9 -yes  . How old were you when you first get pregnant? | 12-17                              |  |
|     |                                                                        | 18-23                              |  |
|     |                                                                        | Above 24                           |  |
| 10  | Did you have any abortion case?                                        | Yes                                |  |
|     |                                                                        | No                                 |  |
| 10A | If answer to Q. 10 is -yes   At what trimester?                        | 1-3 first trimester                |  |
|     |                                                                        | 4-6 Second trimester               |  |
|     |                                                                        | 7-9 Third trimester                |  |

|    |                                                        |                                                     |  |
|----|--------------------------------------------------------|-----------------------------------------------------|--|
| 11 | Have you ever screened for cervical cancer?            | Yes                                                 |  |
|    |                                                        | No                                                  |  |
| 12 | Why did you want to be screened?                       | My doctor ordered the screening                     |  |
|    |                                                        | I suspect something is wrong with my cervix or womb |  |
|    |                                                        | I observed some signs and symptoms                  |  |
|    |                                                        | I just wanted to know my status                     |  |
|    |                                                        | Other reason :                                      |  |
| 13 | What do you think are risk factor for cervical cancer? |                                                     |  |
|    |                                                        |                                                     |  |
|    |                                                        |                                                     |  |
|    |                                                        |                                                     |  |
|    |                                                        |                                                     |  |

**Table: HPV prevalence among socio-demographics variables**

| Characteristics       |              | HPV      |          | p- value |
|-----------------------|--------------|----------|----------|----------|
|                       |              | Negative | Positive |          |
| <b>AGE</b>            | 16 – 25      | 2        | 0        | 0.8875   |
|                       | 26 – 35      | 30       | 3        |          |
|                       | 36 and Above | 191      | 21       |          |
| <b>Marital status</b> | Divorced     | 34       | 4        | 0.7825   |
|                       | Married      | 141      | 14       |          |
|                       | Single       | 17       | 3        |          |
|                       | Widowed      | 31       | 3        |          |

|                           |                      |                     |     |    |        |
|---------------------------|----------------------|---------------------|-----|----|--------|
| <b>Educational status</b> | 1st Degree and above |                     | 26  | 1  | 0.9374 |
|                           | Diploma              |                     | 28  | 2  |        |
|                           | Certificate          |                     | 11  | 1  |        |
|                           | Grade 9-12           |                     | 65  | 8  |        |
|                           | Primary (1-8)        |                     | 54  | 7  |        |
|                           | Read and write       |                     | 9   | 1  |        |
| Illiterate                |                      | 30                  | 4   |    |        |
| <b>Employment status</b>  | Employed full-time   |                     | 76  | 6  | 0.5456 |
|                           | Employed part-time   |                     | 25  | 3  |        |
|                           | Student              |                     | 4   | 1  |        |
|                           | Unemployed           |                     | 118 | 4  |        |
|                           | Earn per month       | More than 3000 Birr | 145 | 14 | 0.873  |
|                           | 1501-3000 Birr       | 36                  | 5   |    |        |
|                           | 501-1500 Birr        | 31                  | 4   |    |        |
|                           | 500 and less Birr    | 11                  | 1   |    |        |

## **DNA extraction protocol used in the study**

### **DNA isolation protocol from cotton swab**

1. Immerse the dried cotton swab in 1.2 mL lysis solution (Lysis solution = 10 mM trisHCL, 5 mM ethylene diamine tetra acetate (EDTA) and 5% sodium dodecyl sulphate at pH 8.0 containing 12  $\mu$ L of 20mg/mL proteinase K)
2. Incubate at 55°C for 6 hours, (and keep it at room temperature overnight if necessary)
3. Remove the cotton swab
4. Add 650  $\mu$ L cold solution of 8 M ammonium acetate with 1 mM EDTA and mix by gently vortexing
5. Chill on ice for about 10 minutes
6. Centrifuge at 6000 rpm for 20 minutes
7. Transfer 750  $\mu$ L of the supernatant into two clean 1.5 mL microtubes containing 750  $\mu$ L cold isopropanol with wide bore pipette tips and mix by inverting gently several times (~20 times)
8. Centrifuge at 13000rpm for 10minutes and pour off the supernatant and invert each tube and leave to drain on clean absorbent paper
9. Add 1mL 90% ethanol and mix by inverting gently several times
10. Centrifuge at 13000 rpm for 10 minutes and pour off the ethanol and invert each tube and leave to drain on clean absorbent paper
11. Re-suspend the pellet in 100  $\mu$ L 1XTE buffer
